# Supplementary material
Source: ML conference proceedings conference paper supplement (https://openreview.net/forum?id=RPowYXiRmW)

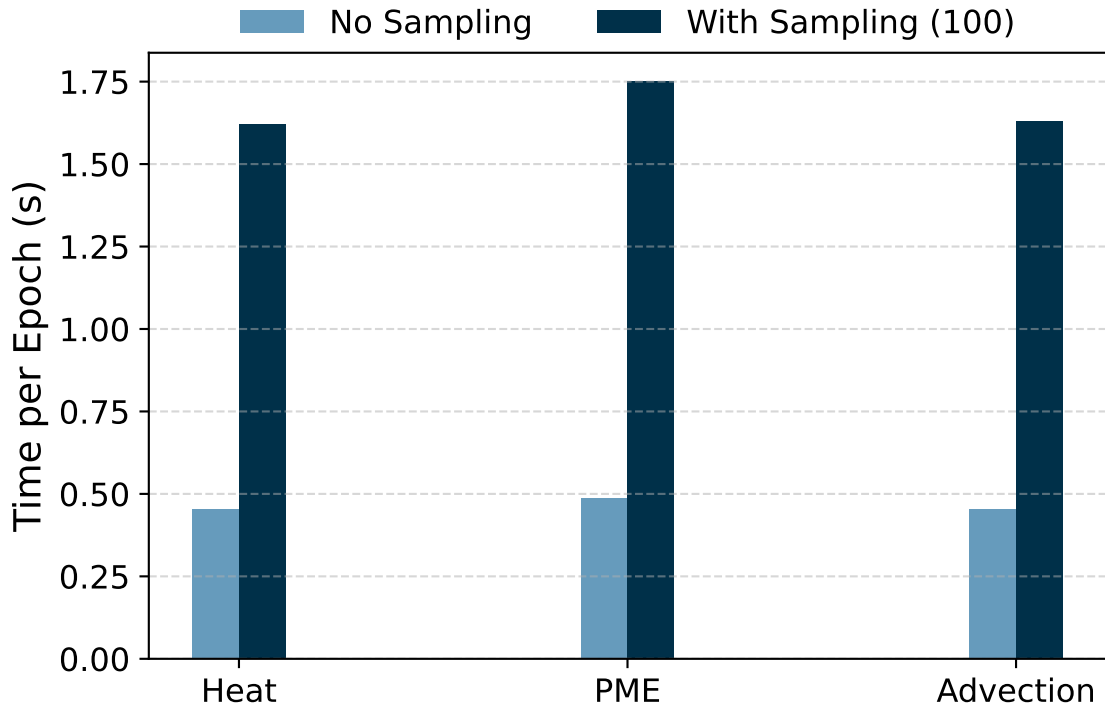

Supplement: supplementary_material [file pde_timing_sampling-checkpoint.pdf › ProbHardE2E_Supp_Materials/probharde2e-pdes/.ipynb_checkpoints/pde_timing_sampling-checkpoint.pdf]
